# Supplementary material for: Inhibitory NKG2A+ and absent activating NKG2C+ NK cell responses are associated with the development of EBV+ lymphomas
Source: PubMed Central journal article supplement (PMC10324562; doi:10.3389/fimmu.2023.1183788), 2023-06-22
Supplement: DataSheet_1.pdf [file DataSheet_1.pdf]

*Supplementary Material*

**Inhibitory NKG2A<sup>+</sup> and absent activating NKG2C<sup>+</sup> NK cell responses  
are associated with the development of EBV<sup>+</sup> lymphomas**

Hannes Vietzen <sup>1</sup>, Philipp B. Staber <sup>2</sup>, Sarah M. Berger <sup>1</sup>, Philippe L. Furlano <sup>1</sup>, Laura M. Kühner <sup>1</sup>,  
Simone Lubowitzki <sup>2</sup>, Alexander Pichler <sup>2</sup>, Robert Strassl <sup>3</sup>, Jan J. Cornelissen <sup>4</sup> and Elisabeth  
Puchhammer-Stöckl <sup>1</sup>

\* **Correspondence:** Hannes Vietzen: [hannes.vietzen@meduniwien.ac.at](mailto:hannes.vietzen@meduniwien.ac.at)

Figure S1

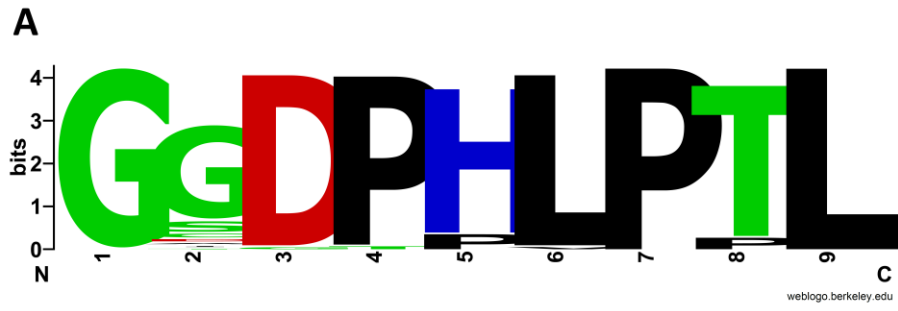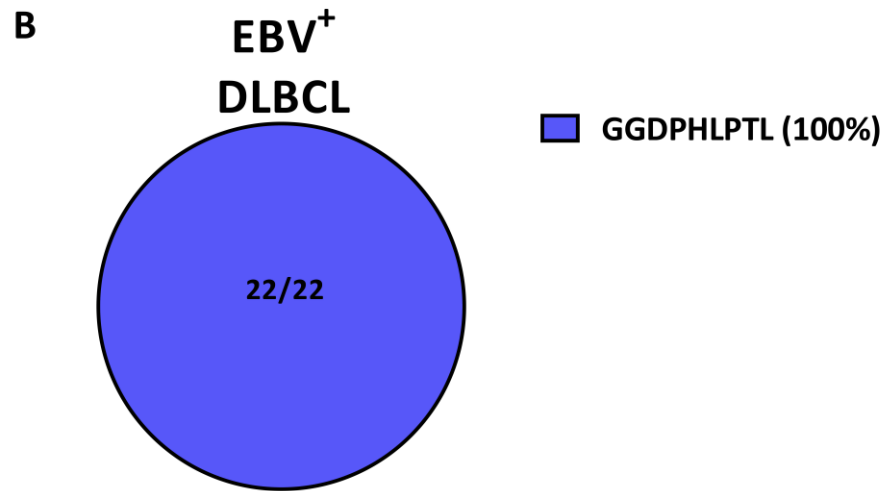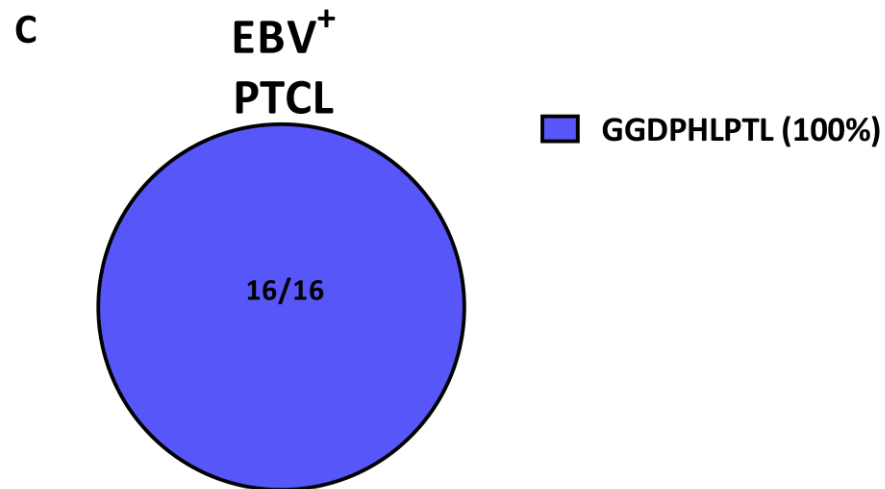

Figure S1: Sequence logo alignment and relative frequency of *LMP-1* peptide variants in EBV<sup>+</sup>DLBCL and EBV<sup>+</sup>PTCL patients. (A) Sequence logo alignment of the relative frequency of *LMP-1* peptide variants from *N*=255 partially sequenced *LMP-1* genes from patients with an asymptomatic EBV reactivation (*N*=96), symptomatic EBV reactivation (*N*=96), EBV<sup>+</sup> HL (*N*=25) and EBV<sup>+</sup> nHL (*N*=28). Sequence logos were created with the web-tool of the University of California, (<https://weblogo.berkeley.edu/>). (B-C) Distribution of *LMP-1* variants in patients with (B) EBV<sup>+</sup>DLBCL (*N*=22) and (C) EBV<sup>+</sup>PTCL (*N*=16). Fractions represent the relative frequency of the *LMP-1* peptide *GGDPHLPTL*, *GSDPHLPTL*, *GGDPHLPPPL*, *GGDPPLPTL*, *GCDPHLPTL*, *GIDPHLPTL*, *GAGPHLPTL*, *GGDTPLPTL*, *GDDPHLPTL*, *GGDPHVPTL* and *GTDPHLPTL* variants. **DLBCL**: Diffuse large B cell lymphoma, **EBV**: Epstein–Barr virus, **PTCL**: Peripheral T cell lymphoma.

Figure S2

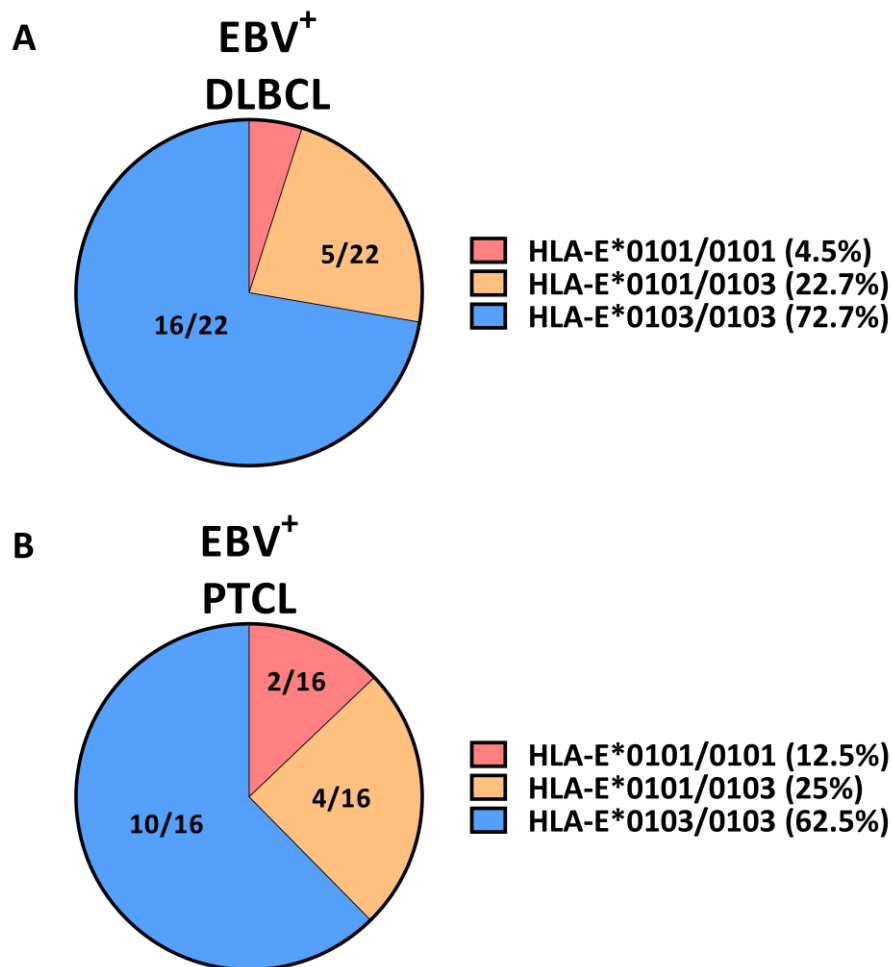

Figure S2: HLA-E variants are associated with the development of EBV<sup>+</sup>DLBCL and EBV<sup>+</sup>PTCL. (A-B) Distribution of HLA-E variants in patients with (A) EBV<sup>+</sup>DLBCL (N=22) and (B) EBV<sup>+</sup>PTCL (N=16). Fractions represent the relative frequency of HLA-E\*0101/0101, HLA-E\*0101/0103 and HLA-E\*0103/0103. **DLBCL**: Diffuse large B cell lymphoma, **EBV**: Epstein–Barr virus, **PTCL**: Peripheral T cell lymphoma.

**Figure S3**

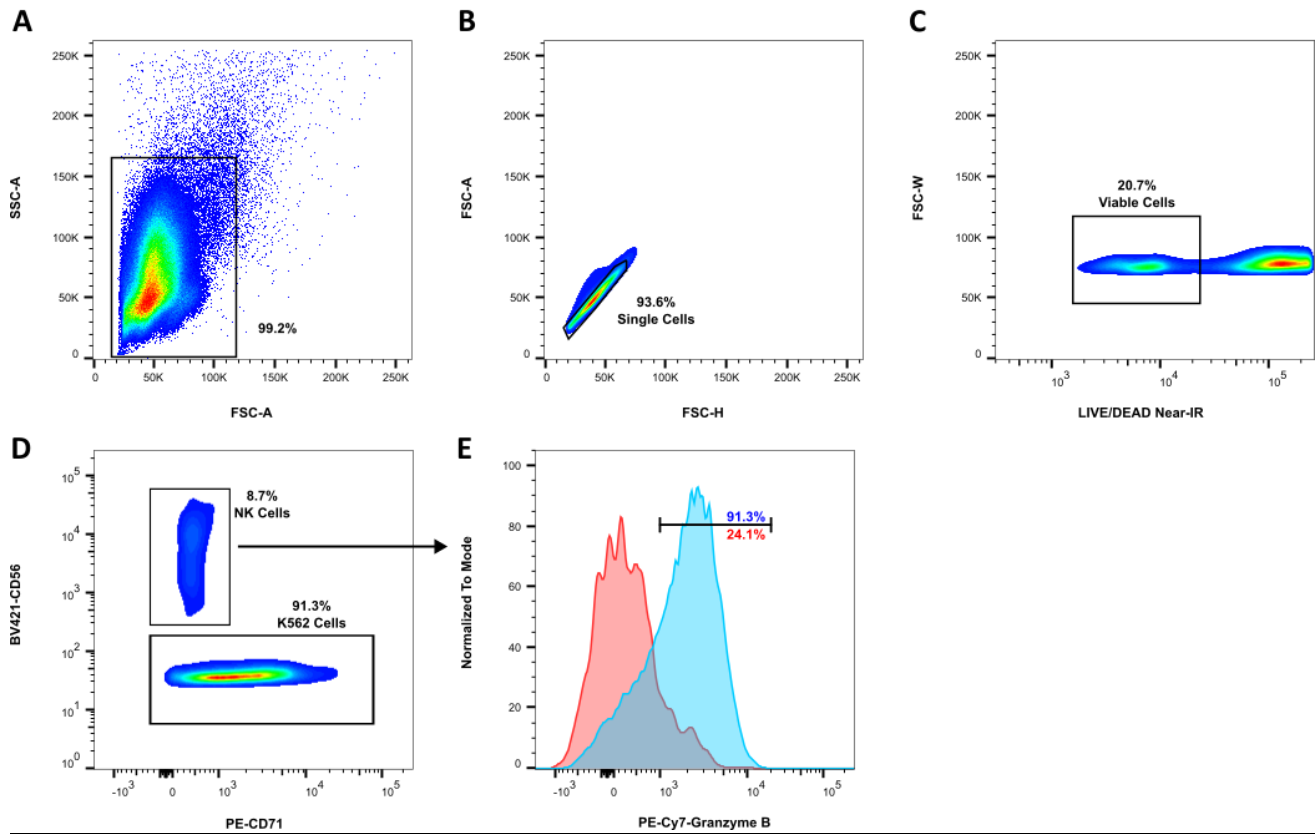

**Figure S3: Proliferation Assay:** NKG2A<sup>+</sup>CD56<sup>+</sup> NK cells from one healthy blood donor were cultured in the presence of K562-CR2-HLA-E\*0103/0103 cells and 300  $\mu$ M of EBV *LMP-1 GGDPHLPTL* peptide for 6 days. The frequency of (A-D) viable CD56<sup>+</sup> NK cells or K562-CR2-HLA-E\*0103/0103 cells was assessed by flow-cytometry. (E) The percentage of activated (gGranzyme B<sup>+</sup>) CD56<sup>+</sup> NK cells (red) was assessed in comparison to the negative control, *e.g.* NKG2A<sup>+</sup>CD56<sup>+</sup> NK cells, cultured together with K562-CR2-HLA-E\*0103/0103 cells, but without LMP-1 peptides. One representative example of one blood donor is shown.

Figure S4

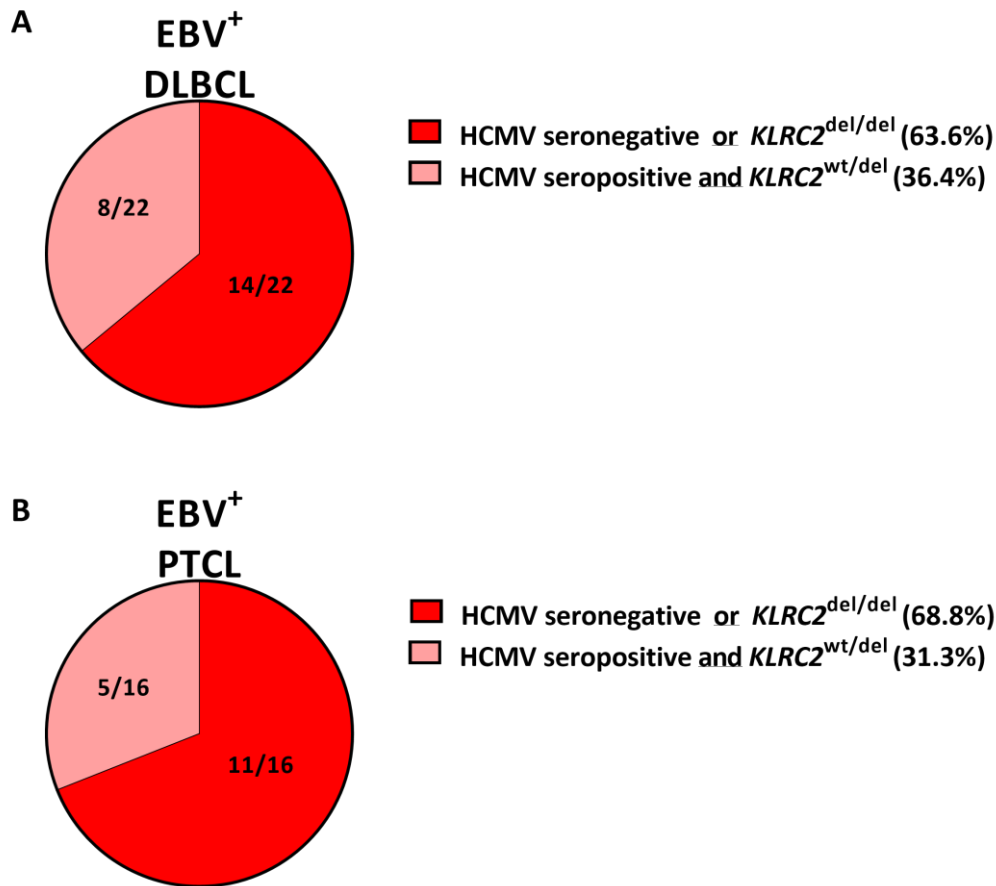

Figure S4: *KLRC2* variants are associated with the development of EBV<sup>+</sup>DLBCL and EBV<sup>+</sup> PTCL.

(A-B) Distribution of *KLRC2* variants in HCMV-seropositive and HCMV-seronegative individuals with (A) EBV<sup>+</sup>DLBCL (N=22) and (B) EBV<sup>+</sup>PTCL (N=16). Fractions represent the relative frequency of in *KLRC2* variants in HCMV-seropositive and HCMV-seronegative individuals. **DLBCL**: Diffuse large B cell lymphoma, **EBV**: Epstein–Barr virus, **PTCL**: Peripheral T cell lymphoma.
